# Supplementary material for: Formation and properties of liposome-stabilized all-aqueous emulsions based on PEG/dextran, PEG/Ficoll, and PEG/sulfate aqueous biphasic systems
Source: Royal Society of Chemistry journal article supplement (doi:10.1039/d0sm01849j), 2021-01-01
Supplement: d0sm01849j1.pdf [file d0sm01849j1.pdf]

## Formation and Properties of Liposome-Stabilized All-Aqueous Emulsions Based on PEG/Dextran, PEG/Ficoll, and PEG/Sulfate Aqueous Biphasic Systems

Andrew T. Rowland and Christine D. Keating\*

\**Department of Chemistry, Pennsylvania State University, University Park, Pennsylvania 16802, USA. E-mail: keating@chem.psu.edu*

### Figures in Supporting information

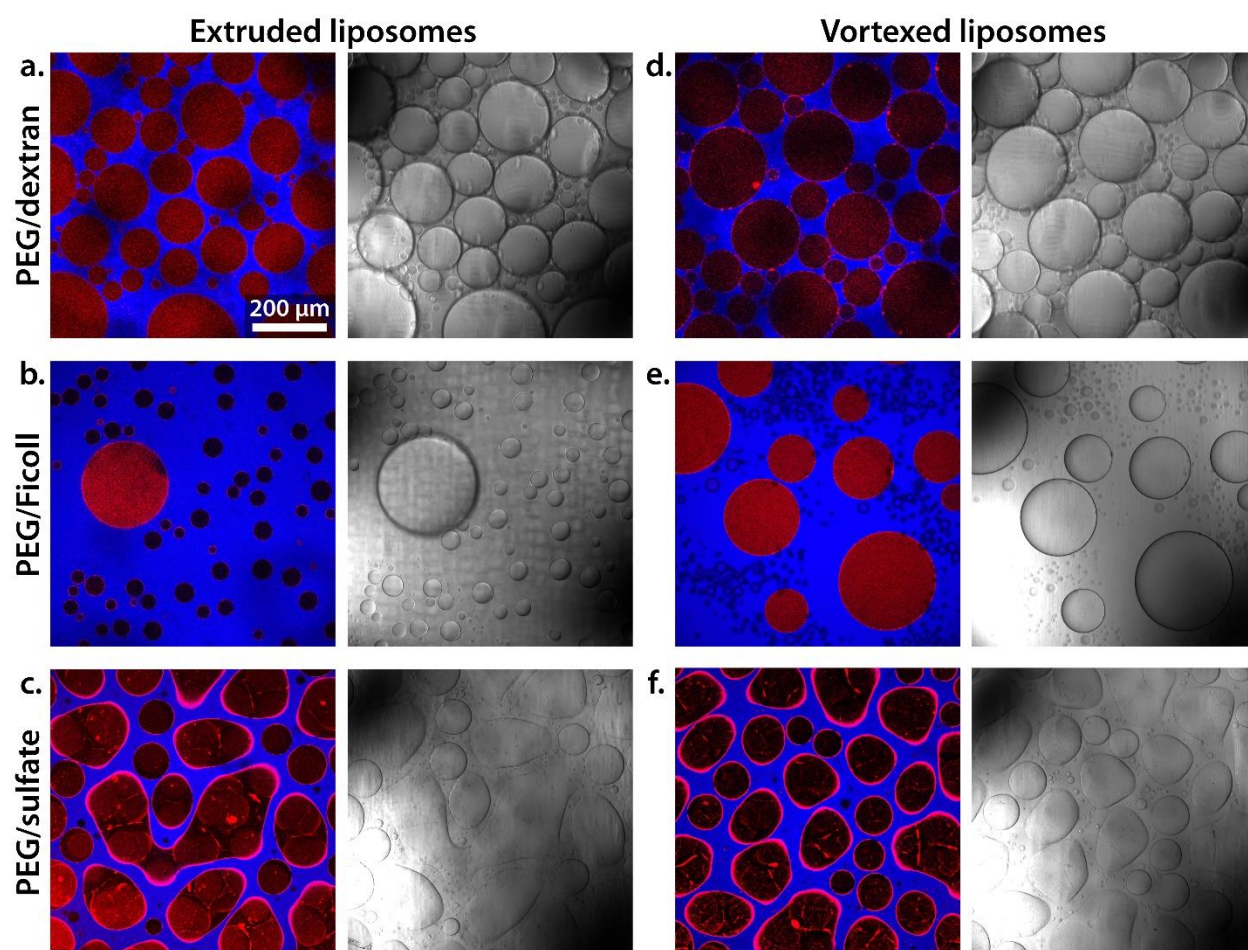

**Figure S1: Comparison of different vesicle-stabilized all-aqueous emulsions at 5 days.** fluorescent confocal microscopy images of various aqueous two-phase separation (ATPS) emulsions stabilized with extruded (a, b, c) and vortexed (d, e, f) liposomes. 5 days after initial sample preparation. Vortexed liposomes were able to effectively stabilize droplets of one phase within a continuous PEG-rich phase in the same manner as extruded liposomes with identical lipid composition. (a,d) PEG/dextran emulsions; (b,e) PEG/Ficoll emulsions; (c,f) PEG/sulfate emulsions. Left panels = overlaid fluorescence; right panels = brightfield. Rhodamine-tagged liposomes have been false colored red, Alexa 647-tagged PEG has been false colored blue.

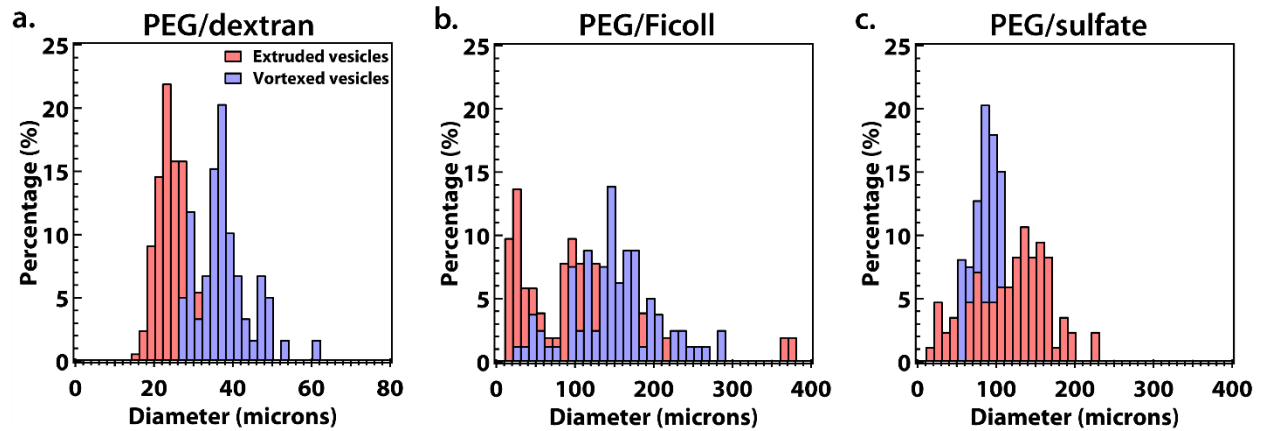

**Figure S2: Effect of ATPS identity and lipid vesicle preparation method on size distributions of vesicle-stabilized all-aqueous emulsions.** Size histograms of droplets in extruded and vortexed vesicle-stabilized ATPS emulsions, 24 hours after preparation. In general, vesicle extrusion results in a decrease in average droplet diameter and distribution spread. (a) Measurements of vesicle (extruded and vortexed)-stabilized dextran-rich droplets; (b) measurements of vesicle-stabilized Ficoll-rich droplets; (c) measurements of vesicle-stabilized sulfate-rich droplets. Red bars indicate emulsions with extruded vesicles, blue indicate vortexed. Approximately 100 droplets were measured across 4 images for each data set.

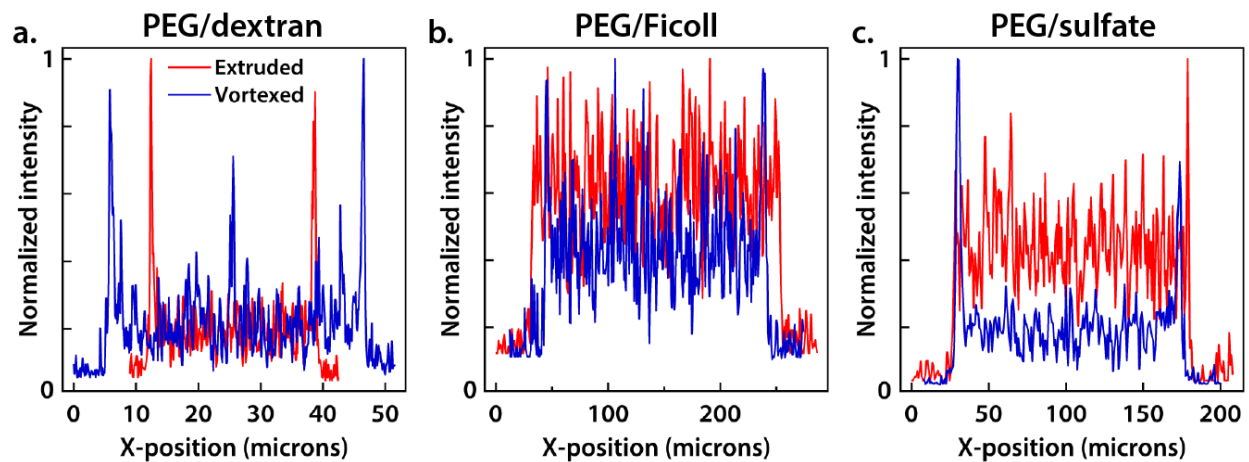

**Figure S3: Fluorescent 2D line scans of Rhodamine fluorescence in vesicle-stabilized ATPS emulsions 24 hours after initial preparation.** Line scans were performed across the full diameter of individual droplets in (a) PEG/dextran, (b) PEG/Ficoll, or (c) PEG/sulfate samples. Raw fluorescence data were extracted from fluorescent confocal microscopy images.

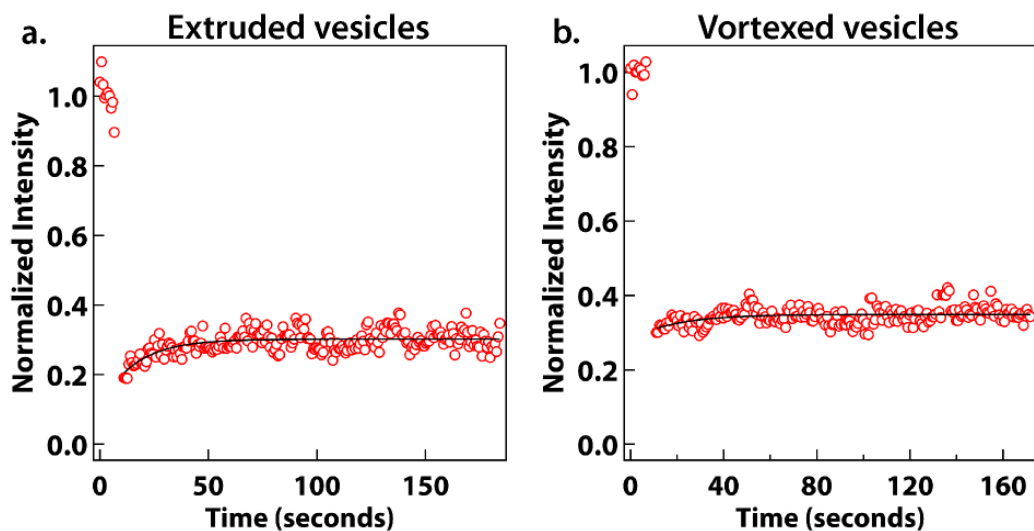

**Figure S4: Examining the mobility of vesicles at interface of stabilized emulsions using FRAP.** Vesicles assembled at the interface are similarly immobile for extruded and vortexed vesicles. Fluorescence recovery after photobleaching (FRAP) curves for vesicle diffusion in vesicle stabilized PEG/dextran ATPS emulsions. Curves depict the fluorescent bleaching and recovery of Rhodamine-tagged (a) extruded and (b) vortexed vesicles at the PEG/Dx interface. A fraction of the interface was bleached and monitored for fluorescence recovery, which would indicate exchange with unbleached labeled lipid vesicles.

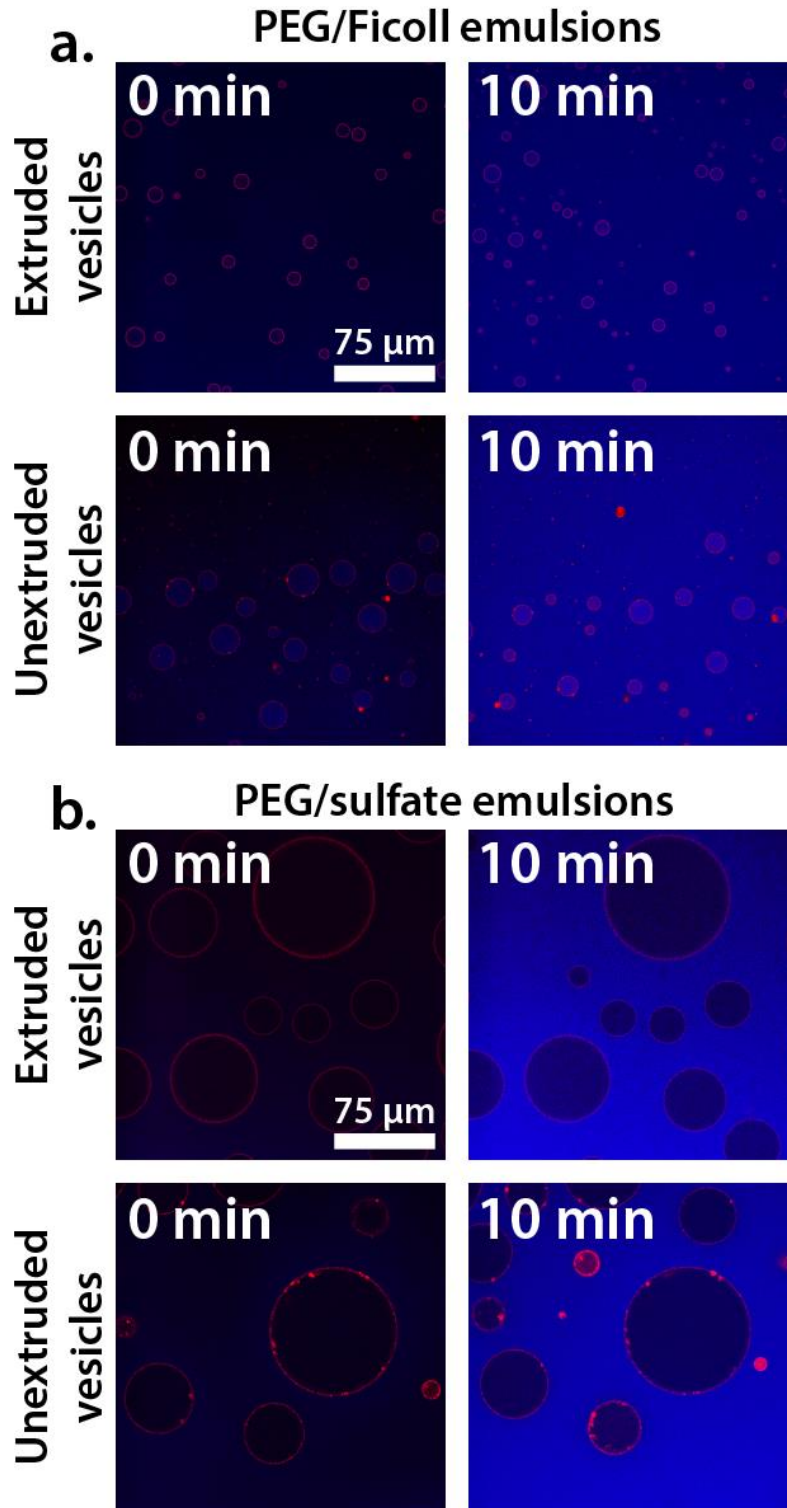

**Figure S5: Tracking the diffusion of fluorescently tagged U15 oligoRNA throughout stabilized emulsions.** Fluorescent confocal microscopy images depicting diffusion of labeled-RNA (U15) through vesicle-stabilized (a) PEG/dextran and (b) PEG/sulfate ATPS emulsions. Experimental setup depicted in Figure 5a was used for all samples. Inset refers to time after diffusion initiation. Rhodamine-tagged vesicles have been false-colored red, Alexa 647-tagged U15 blue.

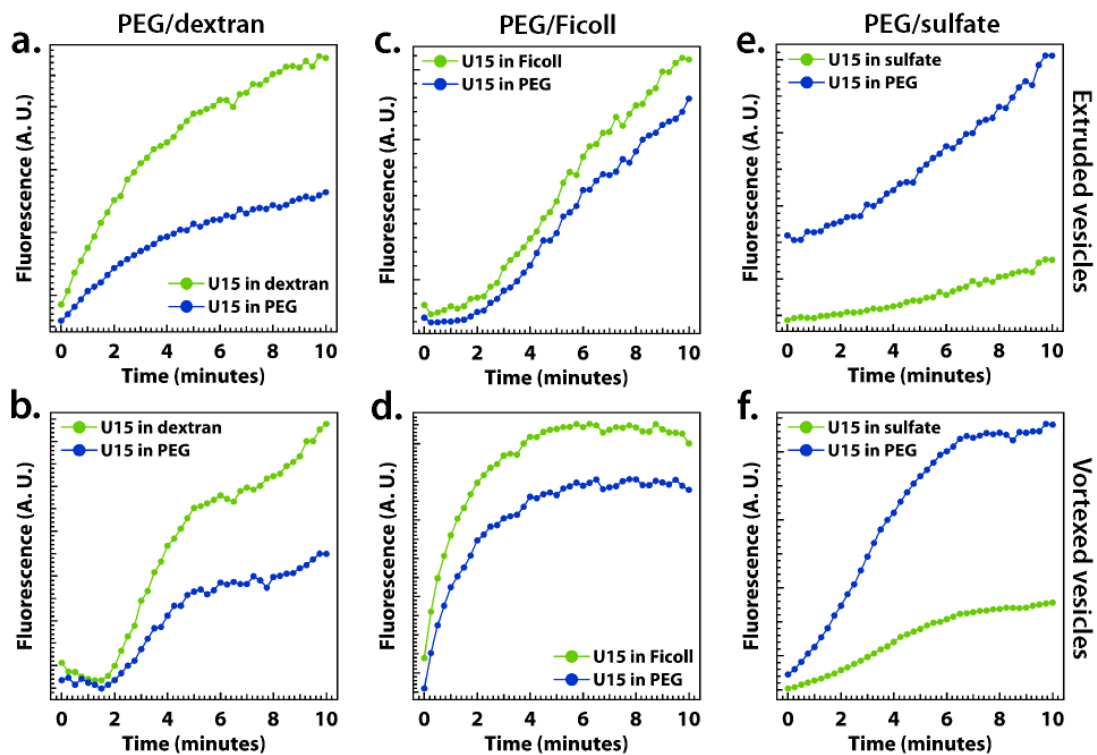

**Figure S6: Tracking the diffusion of fluorescently tagged U15 oligoRNA inside stabilized emulsions.** Relative Alexa-647 fluorescence in liposome-stabilized (a,d) PEG/Dx, (b,e) PEG/Ficoll, and (c,f) PEG/sulfate ATPS prepared with (a-c) extruded or (d-f) vortexed liposomes during U15 diffusion. Experimental setup depicted in Figure 5a was used for all samples. Time refers to time after addition of the cover slip and fusion of droplets.
